# Supplementary material for: BiSCoT: improving large eukaryotic genome assemblies with optical maps
Source: PeerJ journal article supplement (doi:10.7717/peerj.10150), 2020-11-05
Supplement: supplementary_data.pdf [file supplementary_data.pdf]

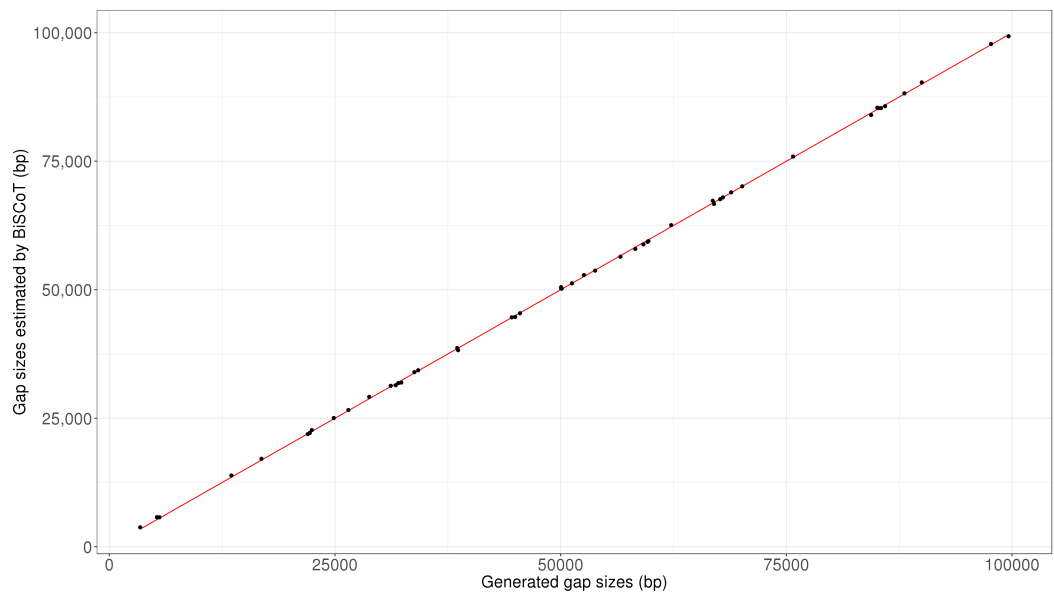

**Supplementary Figure 1.** Distribution of gap sizes estimated by BiSCoT using the optical maps against the gap sizes introduced in the simulated Human chromosome 1 assembly

|                                         | Overlaps  | Gaps      | Contained contigs |
|-----------------------------------------|-----------|-----------|-------------------|
| Generated number of events              | 50        | 50        | 5                 |
| Cumulative size of events before BiSCoT | 2,206,983 | 2,547,879 | 1,168,275         |
| Mean size of events before BiSCoT       | 44,139    | 50,957    | 233,655           |
| Min size of events before BiSCoT        | 278       | 3,420     | 215,581           |
| Max size of events before BiSCoT        | 98,683    | 99,611    | 283,879           |
| Remaining number of events after BiSCoT | 11        | 50        | 0                 |
| Cumulative size of events after BiSCoT  | 30,587    | 2,549,286 | -                 |
| Mean size of events after BiSCoT        | 2680      | 50,985    | -                 |
| Min size of events after BiSCoT         | 278       | 3,392     | -                 |
| Max size of events after BiSCoT         | 5,959     | 99,792    | -                 |

**Supplementary Table 1.** Metrics of the overlaps, gaps and contained contigs introduced in the simulated Human genome's chromosome 1 assembly before and after applying BiSCoT.

|                 | Simulated contigs | Bionano     |             | BiSCoT           |             |
|-----------------|-------------------|-------------|-------------|------------------|-------------|
|                 |                   | Contigs     | Scaffolds   | Contigs          | Scaffolds   |
| Cumulative size | 231,215,374       | 231,215,374 | 252,023,317 | 227,870,703      | 248,278,703 |
| N50             | 2,429,486         | 2,363,641   | 62,178,504  | <b>3,612,465</b> | 61,255,664  |
| L50             | 46                | 43          | 2           | <b>19</b>        | 2           |
| N90             | <b>1,677,340</b>  | 1,621,176   | 2,792,747   | 1,658,986        | 2,872,288   |
| L90             | 95                | 90          | 10          | <b>55</b>        | 9           |
| auN             | 2,347,866         | 2,260,168   | 62,408,635  | <b>4,569,037</b> | 62,312,336  |
| # Ns            | 0                 | 0           | 20,789,288  | 0                | 20,408,000  |
| NGA50           | 2,354,935         | 2,287,164   | 36,067,187  | <b>2,931,345</b> | 42,227,440  |
| NGA75           | 1,943,500         | 1,803,364   | 2,537,018   | <b>2,034,390</b> | 7,636,847   |
| # misassemblies | <b>0</b>          | <b>0</b>    | 38          | <b>0</b>         | 12          |

**Supplementary Table 2.** Metrics of the simulated contigs of the NA12878 chromosome scaffolds and contigs before or after BiSCoT treatment. Bold formatting indicates the best scoring assembly among contigs.

|                   | Nanopore contigs     | Bionano              |               | BiSCoT               |               |
|-------------------|----------------------|----------------------|---------------|----------------------|---------------|
|                   |                      | Contigs              | Scaffolds     | Contigs              | Scaffolds     |
| Cumulative size   | 547,048,580          | 547,048,579          | 557,059,506   | 544,091,840          | 553,538,342   |
| N50               | 7,294,619            | 6,977,344            | 29,588,784    | <b>12,590,381</b>    | 29,458,880    |
| L50               | 23                   | 23                   | 8             | <b>15</b>            | 8             |
| N90               | 1,304,967            | 1,183,704            | 13,953,050    | <b>2,419,034</b>     | 13,949,143    |
| L90               | 85                   | 88                   | 17            | <b>52</b>            | 17            |
| auN               | 9,034,610            | 8,946,525            | 29,924,521    | <b>12,646,724</b>    | 29,817,651    |
| # Ns              | 0                    | 0                    | 10,010,927    | 0                    | 9,446,502     |
| Complete BUSCOs   | <b>1,601 (99.2%)</b> | <b>1,601 (99.2%)</b> | 1,598 (99.0%) | <b>1,601 (99.2%)</b> | 1,600 (99.2%) |
| Duplicated BUSCOs | 235 (14.6%)          | 235 (14.6%)          | 232 (14.4%)   | <b>234 (14.5%)</b>   | 232 (14.4%)   |
| Missing BUSCOs    | 10 (0.6%)            | <b>9 (0.6%)</b>      | 10 (0.6%)     | <b>9 (0.6%)</b>      | 10 (0.6%)     |

**Supplementary Table 3.** Metrics of the *Brassica oleracea* HDEM scaffolds and contigs before or after BiSCoT treatment. Bold formatting indicates the best scoring assembly among contigs.

|                   | Nanopore contigs   | Bionano              |               | BiSCoT               |               |
|-------------------|--------------------|----------------------|---------------|----------------------|---------------|
|                   |                    | Contigs              | Scaffolds     | Contigs              | Scaffolds     |
| Cumulative size   | 373,437,357        | 373,437,357          | 406,471,180   | 369,747,840          | 402,627,824   |
| N50               | 3,793,063          | 3,603,274            | 15,479,745    | <b>5,519,975</b>     | 15,275,286    |
| L50               | 25                 | 26                   | 8             | <b>17</b>            | 8             |
| N90               | <b>202,023</b>     | 154,330              | 1,748,645     | 181,213              | 1,674,920     |
| L90               | 264                | 309                  | 31            | <b>221</b>           | 31            |
| auN               | 5,532,997          | 5,453,354            | 18,883,302    | <b>7,237,727</b>     | 18,700,050    |
| # Ns              | 0                  | 0                    | 33,033,823    | 0                    | 32,879,984    |
| Complete BUSCOs   | 1,604 (99.4%)      | <b>1,605 (99.5%)</b> | 1,604 (99.4%) | <b>1,605 (99.5%)</b> | 1,604 (99.4%) |
| Duplicated BUSCOs | <b>233 (14.4%)</b> | 235 (14.6%)          | 234 (14.5%)   | <b>233 (14.4%)</b>   | 233 (14.4%)   |
| Missing BUSCOs    | <b>7 (0.5%)</b>    | <b>7 (0.5%)</b>      | 7 (0.5%)      | <b>7 (0.5%)</b>      | 7 (0.5%)      |

**Supplementary Table 4.** Metrics of the *Brassica rapa* Z1 scaffolds and contigs before or after BiSCoT treatment. Bold formatting indicates the best scoring assembly among contigs.

|                   | Nanopore contigs | Bionano              |               | BiSCoT           |               |
|-------------------|------------------|----------------------|---------------|------------------|---------------|
|                   |                  | Contigs              | Scaffolds     | Contigs          | Scaffolds     |
| Cumulative size   | 518,619,765      | 518,619,765          | 526,521,784   | 517,940,161      | 525,719,686   |
| N50               | 4,019,832        | 2,097,979            | 36,762,080    | <b>7,987,169</b> | 36,858,856    |
| L50               | 33               | 60                   | 6             | <b>24</b>        | 6             |
| N90               | 554,125          | 292,444              | 9,697,206     | <b>888,370</b>   | 9,721,221     |
| L90               | 180              | 310                  | 15            | <b>92</b>        | 15            |
| auN               | 5,390,023        | 5,285,943            | 33,951,065    | <b>7,477,787</b> | 33,460,868    |
| # Ns              | 0                | 0                    | 7,902,019     | 0                | 7,779,525     |
| Complete BUSCOs   | 1,558 (96.6%)    | <b>1,562 (96.8%)</b> | 1,561 (96.7%) | 1,560 (96.6%)    | 1,559 (96.6%) |
| Duplicated BUSCOs | 69 (4.3%)        | <b>68 (4.2%)</b>     | 68 (4.2%)     | <b>68 (4.2%)</b> | 70 (4.3%)     |
| Missing BUSCOs    | <b>34 (2.0%)</b> | <b>34 (2.0%)</b>     | 34 (2.0%)     | <b>34 (2.0%)</b> | 34 (2.0%)     |

**Supplementary Table 5.** Metrics of the *Musa schizocarpa* scaffolds and contigs before or after BiSCoT treatment. Bold formatting indicates the best scoring assembly among contigs.

|                   | Nanopore contigs | Bionano       |               | BiSCoT               |               |
|-------------------|------------------|---------------|---------------|----------------------|---------------|
|                   |                  | Contigs       | Scaffolds     | Contigs              | Scaffolds     |
| Cumulative size   | 652,555,937      | 652,555,937   | 665,966,510   | 649,440,360          | 662,857,763   |
| N50               | 2,985,938        | 2,985,938     | 31,920,664    | <b>3,969,296</b>     | 31,819,818    |
| L50               | 51               | 51            | 10            | <b>42</b>            | 10            |
| N90               | 488,936          | 485,536       | 13,186,102    | <b>612,779</b>       | 13,076,771    |
| L90               | 267              | 261           | 21            | <b>216</b>           | 21            |
| auN               | 4,975,870        | 4,969,973     | 29,298,774    | <b>5,711,235</b>     | 29,207,200    |
| # Ns              | 0                | 0             | 13,410,573    | 0                    | 13,417,403    |
| Complete BUSCOs   | 1,569 (97.3%)    | 1,572 (97.4%) | 1,576 (97.6%) | <b>1,576 (97.6%)</b> | 1,573 (97.4%) |
| Duplicated BUSCOs | <b>30 (1.9%)</b> | 31 (1.9%)     | 31 (1.9%)     | 31 (1.9%)            | 31 (1.9%)     |
| Missing BUSCOs    | 26 (1.5%)        | 24 (1.5%)     | 23 (1.5%)     | <b>23 (1.5%)</b>     | 24 (1.5%)     |

**Supplementary Table 6.** Metrics of the *Sorghum bicolor Tx430* scaffolds and contigs before or after BiSCoT treatment. Bold formatting indicates the best scoring assembly among contigs.
